# Supplementary material for: An instrument-free visual quantitative detection method based on clock reaction: the detection of thrombin as an example
Source: Royal Society of Chemistry journal article supplement (doi:10.1039/d2ay01786e), 2022-11-24
Supplement: d2ay01786e1.pdf [file d2ay01786e1.pdf]

## Supporting Information

### An instrument-free visual quantitative detection method based on clock reaction: The detection of thrombin as an example

Tianxiang Wu\*, Xiao-Yuan Li

*Department of Chemistry, The Hong Kong University of Science and Technology, ClearWater Bay, Kowloon, Hong Kong S.A.R., The People's Republic of China*

#### Authors' emails:

Tianxiang Wu: twuas@connect.ust.hk

Xiao-Yuan Li: chxyli@ust.hk

**It contains 1 figure, 2 tables and 2 pages.**

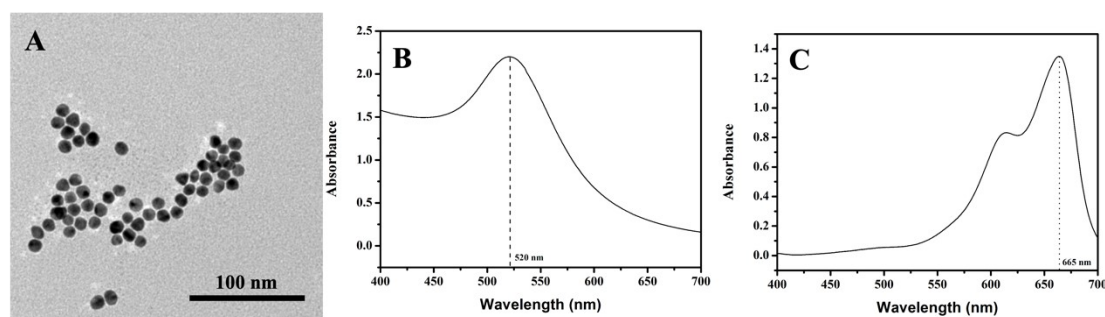

Fig. S1. (A) TEM image of the as-prepared AuNPs with an average size of *ca.* 13 nm; (B) UV-vis spectra of AuNPs sol with a characteristic peak at *ca.* 520 nm; and (C) The characteristic twin absorption of aqueous MB<sup>+</sup> in the visible region peaked at *ca.* 665 nm.

Table S1. Cycle times for the potential interferents alone and the thrombin + an interferent, respectively.

| Sample                           | Cycle time<br>(min) | Standard deviation |
|----------------------------------|---------------------|--------------------|
| 5.3 nM BSA                       | 40.4                | 0.3                |
| 5.3 nM IgG                       | 41.4                | 0.4                |
| 5.3 nM Lys                       | 41.0                | 0.3                |
| 5.3 nM UA                        | 40.4                | 0.2                |
| 5.3 nM glucose                   | 40.6                | 0.2                |
| 5.3 nM AA                        | 40.6                | 0.3                |
| 5.3 nM thrombin                  | 29.3                | 0.5                |
| 5.3 nM BSA + 5.3 nM thrombin     | 31.0                | 0.2                |
| 5.3 nM IgG + 5.3 nM thrombin     | 29.9                | 0.2                |
| 5.3 nM Lys + 5.3 nM thrombin     | 29.8                | 0.2                |
| 5.3 nM UA + 5.3 nM thrombin      | 29.5                | 0.1                |
| 5.3 nM glucose + 5.3 nM thrombin | 29.7                | 0.2                |
| 5.3 nM AA + 5.3 nM thrombin      | 29.4                | 0.3                |

Table S2. Recoveries for the detection of thrombin in human serum

| Added (ng/ml) | Found by this method (ng/ml) | Recovery (%) |
|---------------|------------------------------|--------------|
| 1.00          | 1.07                         | 107          |
| 4.00          | 4.30                         | 108          |
| 15.0          | 13.9                         | 92.7         |
